# Supplementary material for: Impact of dietary supplementation with resistant dextrin (NUTRIOSE®) on satiety, glycaemia, and related endpoints, in healthy adults
Source: PubMed Central journal article supplement (PMC8572182; doi:10.1007/s00394-021-02618-9), 2021-06-25

Supplementary figure 2

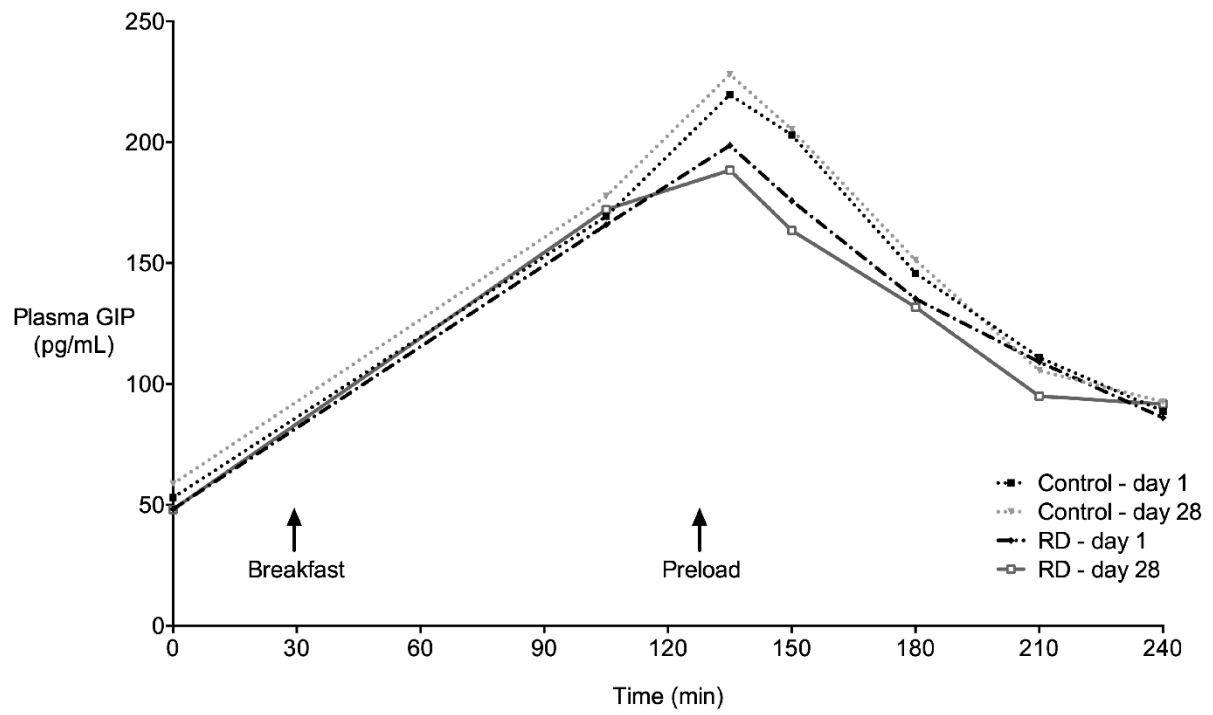

Supplement: 394_2021_2618_MOESM2_ESM.pdf [file 394_2021_2618_MOESM2_ESM.pdf]
